# Supplementary material
Source: PubMed Central journal article supplement (PMC3984501)
Supplement: NIHMS542560-supplement-01.pdf [file NIHMS542560-supplement-01.pdf]

**Table S1. Subject Attrition: Randomized to Basic Treatment (n=12)**

| Rate | Reason for Dropout                             | Up To End of Wk 3 | Wk 4 and After |
|------|------------------------------------------------|-------------------|----------------|
| 3    | Withdrawn consent                              | 2                 | 1              |
| 2    | Lost to follow-up                              | 0                 | 2              |
| 1    | Severe physical illness of parent <sup>a</sup> | 0                 | 1              |
| 1    | Terminated for nonadherence                    | 0                 | 1              |
| 1    | Terminated because of lack of efficacy         | 0                 | 1              |
| 2    | Adverse events                                 | 0                 | 2              |
| 1    | Hospitalized (serious physical threats)        | 1                 | 0              |
| 1    | Moved out of state                             | 0                 | 1              |

Notes: Basic = parent training (PT) + stimulant (STIM) + placebo (PBO). <sup>a</sup>This was a Parent Training (PT) + Stimulant (STIM) responder.

**Table S2. Subject Attrition: Randomized to Augmented Treatment (n=18)**

| Rate | Reason for Dropout                     | Up To End of Wk 3 | Wk 4 and After |
|------|----------------------------------------|-------------------|----------------|
| 6    | Withdrawn consent                      | 4                 | 2              |
| 3    | Lost to follow-up                      | 1                 | 2              |
| 2    | Severe physical illness of parent      | 1                 | 1              |
| 3    | Terminated for nonadherence            | 2                 | 1              |
| 2    | Terminated because of lack of efficacy | 1                 | 1              |
| 1    | Adverse events                         | 1                 | 0              |
| 1    | Unable to swallow medicine             | 1                 | 0              |

Note: Augmented = parent training (PT) + stimulant (STIM) + risperidone (RIS).
